# Supplementary material for: Eight weeks of dry dynamic breath-hold training results in larger spleen volume but does not increase haemoglobin concentration
Source: Front Physiol. 2022 Oct 7;13:925539. doi: 10.3389/fphys.2022.925539 (PMC9585269; doi:10.3389/fphys.2022.925539)
Supplement: Supplementary file 1 [file Table2.XLSX]

## Sheet: breath-hold group blood
Subject	Red blood cell count/RBC		Hemoglobin/HGB		Hematocrit/HCT		Mean corpuscular volume/MCV		Mean corpuscular hemoglobin/MCH		Mean corpuscular hemoglobin concentration/MCHC		Coefficient variation of red blood cell volume distribution width/RDW-CV		Standard deviation in red cell distribution width/RDW-SD		Platelet count/PLT		Mean platelet volume/MPV		Platelet distribution width/PDW		Plateletcrit/PCT		Platelet Large Cell count (bulky Platelet)/P-LCC		Platelet Large Cell Ratio/P-LCR		White blood cell count/WBC		Neutrophil/NEU#		Lymphocyte/LYM#		Monocytes/MON#		Eosinophil/EOS#		Basophile/BAS#		Neutrophil ratio/NEU%		Lymphocyte ratio/LYM%		Monocytes ratio/MON%		Eosinophil ratio/EOS%		Basophile ratio/BAS%
	Baseline	After training	Baseline	After training	Baseline	After training	Baseline	After training	Baseline	After training	Baseline	After training	Baseline	After training	Baseline	After training	Baseline	After training	Baseline	After training	Baseline	After training	Baseline	After training	Baseline	After training	Baseline	After training	Baseline	After training	Baseline	After training	Baseline	After training	Baseline	After training	Baseline	After training	Baseline	After training	Baseline	After training	Baseline	After training	Baseline	After training	Baseline	After training	Baseline
A1	5.49	5.38	165	163	49.4	48.6	90	90.3	30	30.2	334	335	12.7	13	40.9	41.8	301	314	9.7	9.7	16.2	16.3	0.29	0.31	71	77	23.6	24.6	4.62	4.57	2.87	2.66	1.38	1.53	0.28	0.31	0.07	0.05	0.02	0.02	62	58.1	29.9	33.4	6.1	6.8	1.6	1.2	0.4
A2	5.42	5.38	168	170	50	50	92.1	93.1	31	31.6	336	340	12.8	13	42.1	43.1	205	205	11.9	11.9	16.6	16.9	0.25	0.25	78	81	38	39.3	5.11	5.99	2.71	2.87	2	2.57	0.27	0.43	0.11	0.1	0.02	0.02	53.1	47.9	39.1	42.9	5.4	7.1	2.1	1.7	0.3
A3	4.96	5	155	156	46.4	46.8	93.5	93.6	31.2	31.2	333	333	12.5	12.6	41.9	41.9	228	244	9.1	8.7	15.9	15.8	0.21	0.21	42	41	18.5	16.7	4.54	5.58	2.55	3.08	1.6	2.13	0.31	0.27	0.06	0.08	0.02	0.02	56	55.2	35.3	38.2	6.9	4.8	1.3	1.4	0.5
A4	5.43	5.26	163	163	49.6	47.8	91.5	90.8	30.1	31	329	341	12.6	12.9	41	41.8	273	250	10.7	10.4	17	17	0.29	0.26	85	72	31.1	28.7	5.25	6.65	2.68	3.54	2.01	2.56	0.44	0.43	0.1	0.1	0.02	0.02	51	53.2	38.4	38.5	8.3	6.5	1.9	1.5	0.4
A5	5.41	5.41	164	164	49.4	48.9	91.4	90.4	30.4	30.4	333	336	13.2	13	43.1	41.9	230	206	8.3	7.9	15.6	15.6	0.19	0.16	32	26	14	12.4	5.78	6.21	2.38	2.63	2.98	3.07	0.32	0.45	0.07	0.05	0.03	0.01	41.1	42.4	51.4	49.3	5.6	7.3	1.3	0.8	0.6
A6	4.36	4.55	141	150	42.8	44.5	98.2	97.7	32.5	32.9	331	337	11.8	11.9	41.6	41.5	206	206	11.3	11	16.5	16.3	0.23	0.23	72	68	34.8	32.8	4.15	4.08	2.1	1.66	1.74	2.04	0.21	0.32	0.08	0.03	0.02	0.03	50.4	40.7	42	49.9	5.1	7.8	1.9	0.8	0.6
A7	4.88	4.65	123	111	39.5	36.2	81.1	77.9	25.3	23.9	311	306	13.9	13.8	40.4	38.4	294	290	10.9	10.7	16	16.1	0.32	0.31	100	92	33.9	31.8	3.78	4.46	1.62	2.28	1.78	1.75	0.26	0.33	0.09	0.08	0.03	0.02	42.9	51.2	47.1	39.4	6.9	7.3	2.4	1.7	0.7
A8	4.59	4.73	132	134	40.5	41	88.3	86.7	28.8	28.4	326	327	14	14.8	44	45.9	295	311	9.4	8.8	16.1	15.9	0.28	0.28	63	57	21.5	18.3	9.11	6.17	6.61	3.36	1.62	2.13	0.7	0.5	0.15	0.13	0.03	0.05	72.6	54.4	17.7	34.4	7.7	8.2	1.6	2.2	0.4
A9	4.64	4.72	140	145	42.7	43.3	92.1	91.7	30.2	30.6	328	334	12.8	12.4	41.9	40.8	314	272	9.5	9	16.1	15.8	0.3	0.25	71	51	22.7	18.9	6.03	6.23	3.69	3.16	1.96	2.64	0.27	0.32	0.09	0.09	0.02	0.02	61.2	50.8	32.5	42.4	4.5	5.1	1.5	1.4	0.3
A10	4.85	4.86	147	149	44.9	44.7	92.6	92	30.4	30.7	328	333	12.8	12.7	42.4	41.9	226	241	12.7	11.8	16.1	16.2	0.29	0.29	101	94	44.7	38.9	7.31	7.94	4.82	5.74	1.97	1.74	0.38	0.39	0.1	0.03	0.04	0.04	66	72.2	27	21.9	5.2	5	1.3	0.4	0.5
A11	4.3	4.36	141	144	41.5	42.2	96.6	96.7	32.8	33.1	340	342	12.3	12.3	42.5	42.6	192	192	11	11.6	16.7	16.7	0.21	0.22	63	70	33	36.5	5.61	5.39	3.46	2.89	1.73	2.02	0.33	0.37	0.07	0.09	0.02	0.02	61.7	53.6	30.8	37.6	5.9	6.8	1.2	1.6	0.4
A12	4.2	4.17	133	132	40.3	39.3	95.8	94.3	31.6	31.7	330	337	12.2	12.5	41.8	42.1	270	229	10	9.6	16.2	16.4	0.27	0.22	68	53	25.3	23.2	5.27	8.25	3.06	5.42	1.88	2.27	0.28	0.51	0.03	0.03	0.02	0.02	58	65.8	35.7	27.5	5.3	6.1	0.6	0.4	0.4
[truncated: 1 more columns]
