# Supplementary material for: Eight weeks of dry dynamic breath-hold training results in larger spleen volume but does not increase haemoglobin concentration
Source: Front Physiol. 2022 Oct 7;13:925539. doi: 10.3389/fphys.2022.925539 (PMC9585269; doi:10.3389/fphys.2022.925539)
Supplement: Supplementary file 2 [file Table3.XLSX]

## Sheet: breath-hold group blood
Subject	Red blood cell count/RBC		Hemoglobin/HGB		Hematocrit/HCT		Mean corpuscular volume/MCV		Mean corpuscular hemoglobin/MCH		Mean corpuscular hemoglobin concentration/MCHC		Coefficient variation of red blood cell volume distribution width/RDW-CV		Standard deviation in red cell distribution width/RDW-SD		Platelet count/PLT		Mean platelet volume/MPV		Platelet distribution width/PDW		Plateletcrit/PCT		Platelet Large Cell count (bulky Platelet)/P-LCC		Platelet Large Cell Ratio/P-LCR		White blood cell count/WBC		Neutrophil/NEU#		Lymphocyte/LYM#		Monocytes/MON#		Eosinophil/EOS#		Basophile/BAS#		Neutrophil ratio/NEU%		Lymphocyte ratio/LYM%		Monocytes ratio/MON%		Eosinophil ratio/EOS%		Basophile ratio/BAS%
	Baseline	After training	Baseline	After training	Baseline	After training	Baseline	After training	Baseline	After training	Baseline	After training	Baseline	After training	Baseline	After training	Baseline	After training	Baseline	After training	Baseline	After training	Baseline	After training	Baseline	After training	Baseline	After training	Baseline	After training	Baseline	After training	Baseline	After training	Baseline	After training	Baseline	After training	Baseline	After training	Baseline	After training	Baseline	After training	Baseline	After training	Baseline	After training	Baseline
B1	5.3	5.24	171	165	50.6	49.7	95.3	94.9	32.2	31.6	337	333	13.7	13	46.5	43.9	276	259	10.3	10	16.6	16.3	0.29	0.26	76	68	27.4	26.5	5.82	5.93	3.05	2.99	2.08	2.22	0.32	0.34	0.34	0.34	0.03	0.04	52.4	50.5	35.8	37.3	5.5	5.7	5.8	5.8	0.5
B2	5.54	5.66	160	164	48	49.2	86.6	86.9	28.8	28.9	333	332	13.6	13.7	41.8	42.2	234	256	10	9.9	16	16	0.23	0.25	62	65	26.3	25.2	5.98	5.68	3.63	3.19	1.87	2.1	0.31	0.32	0.13	0.05	0.04	0.02	61	56	31.2	37	5.1	5.7	2.1	0.9	0.6
B3	5.03	5.39	161	170	48.1	51.7	95.7	96.1	32.1	31.5	335	328	12.6	12.9	43.2	44.1	198	191	10.7	9.7	16.5	16.4	0.21	0.19	62	47	31.4	24.8	6.31	5.92	3.51	3.54	2.16	1.87	0.39	0.36	0.23	0.13	0.02	0.02	55.6	59.9	34.2	31.6	6.2	6.1	3.6	2.1	0.4
B4	5.13	5.01	161	158	47.6	46.8	92.8	93.4	31.4	31.5	338	338	13.2	13.5	43.7	45	229	221	10.7	10.7	16.3	16.4	0.24	0.24	70	68	30.5	30.8	5.05	5.4	2.71	3.19	1.88	1.82	0.34	0.29	0.07	0.06	0.05	0.04	53.6	59.2	37.2	33.6	6.8	5.3	1.4	1.1	1
B5	5.42	5.26	166	168	51.1	50	94.3	95.1	30.7	31.9	325	335	13	12.9	44	43.8	189	190	8.7	9.1	16.1	16.2	0.18	0.17	32	39	17	20.3	10.34	5.19	8.23	2.46	1.68	2.29	0.39	0.29	0.02	0.12	0.02	0.03	79.7	47.3	16.2	44.2	3.7	5.5	0.2	2.4	0.2
B6	4.58	4.59	138	139	41.4	40.6	90.3	88.3	30	30.3	332	343	13.7	13.4	44.1	42.2	241	204	10.5	11	16.4	16.5	0.25	0.22	72	68	30	33.2	4.03	6.12	1.92	3.64	1.67	1.99	0.22	0.25	0.2	0.21	0.02	0.03	47.6	59.5	41.3	32.5	5.6	4.1	5	3.4	0.5
B7	4.63	4.59	125	126	39.2	38.6	84.7	84	27.1	27.4	320	326	17	14.1	51.7	42.5	282	299	10.3	10.5	15.9	16.1	0.29	0.32	80	89	28.6	29.7	4.15	3.74	2.05	1.33	1.68	1.96	0.35	0.38	0.05	0.04	0.02	0.03	49.6	35.5	40.6	52.5	8.3	10.2	1.1	1	0.4
B8	5.58	5.21	124	112	39.8	36.3	71.4	69.6	22.2	21.5	310	309	15.4	14.3	39.1	35.4	291	335	9.1	9.1	15.7	16	0.27	0.31	66	76	22.7	22.6	5.25	7.02	2.81	4.99	2.04	1.59	0.33	0.39	0.05	0.03	0.02	0.02	53.5	71.1	38.9	22.7	6.3	5.5	1	0.4	0.3
B9	4.56	4.66	142	143	42	42.7	92	91.7	31	30.7	337	335	12.6	12.8	41.6	41.9	279	276	8.5	8.8	15.6	15.9	0.24	0.24	43	47	15.4	17	7.77	6.28	5.02	2.87	2.23	2.92	0.36	0.35	0.13	0.1	0.03	0.04	64.7	45.8	28.7	46.5	4.6	5.5	1.7	1.6	0.3
B10	4.97	5.01	147	152	44.5	45.6	89.6	91	29.6	30.2	330	332	13.6	13.5	43.6	43.8	235	218	9.7	10.3	16	15.9	0.23	0.23	57	58	24.2	26.8	6.23	12.94	3.96	11.69	1.76	0.69	0.33	0.52	0.16	0.04	0.02	0	63.7	90.3	28.2	5.4	5.3	4	2.6	0.3	0.2
[truncated: 1 more columns]
