# Supplementary material for: Eight weeks of dry dynamic breath-hold training results in larger spleen volume but does not increase haemoglobin concentration
Source: Front Physiol. 2022 Oct 7;13:925539. doi: 10.3389/fphys.2022.925539 (PMC9585269; doi:10.3389/fphys.2022.925539)
Supplement: Supplementary file 3 [file Table4.XLSX]

## Sheet: Sheet1
subject	breath-hold group				subject	Control group
	gender	Baseline	After training			gender	Baseline	After training
A1	male	178.33	220.939		B1	male	143.31	144.812
A2	male	132.97	150.34		B2	male	133.94	148.664
A3	male	85.18	101.872		B3	male	108.83	92.7326
A4	male	54.59	109.14		B4	male	194.84	210.462
A5	male	109.39	143.561		B5	male	169.7	161.01
A6	male	172.59	199.853		B6	female	126.15	133.618
A7	female	146.91	144.21		B7	female	70.81	78.9931
A8	female	51.31	91.4461		B8	female	126.77	144.214
A9	female	92.26	156.17		B9	female	95.55	108.848
A10	female	103.91	121.43		B10	female	110.51	123.06
A11	female	119.47	123.85
A12	female	58.63	65.6431
