# Supplementary material for: Eight weeks of dry dynamic breath-hold training results in larger spleen volume but does not increase haemoglobin concentration
Source: Front Physiol. 2022 Oct 7;13:925539. doi: 10.3389/fphys.2022.925539 (PMC9585269; doi:10.3389/fphys.2022.925539)
Supplement: Supplementary file 4 [file Table1.XLSX]

## Sheet: Sheet1
subject	breath-hold group
	gender	Age(years)	Height(cm)	Body mass(kg)	BMI(kg·m-2)	beat per minute/BPM	systolic blood pressure/sBP(mmHg)	diastolic blood pressure/dBP(mmHg)
A1	male	21	175	65	21.2245	63	110	70
A2	male	21	173	63	21.0498	59	108	72
A3	male	23	171	60	20.5191	61	108	60
A4	male	21	178	68	21.4619	58	118	60
A5	male	19	187	77	22.0195	64	110	70
A6	male	22	180	70	21.6049	63	100	70
A7	female	21	169	52	18.2066	64	118	62
A8	female	20	158	43	17.2248	62	100	64
A9	female	22	160	54	21.0938	65	100	60
A10	female	17	160	45	17.5781	66	110	70
A11	female	22	160	50	19.5312	69	110	64
A12	female	21	170	62	21.4533	62	110	70
subject	Control group
	gender	Age(years)	Height(cm)	Body mass(kg)	BMI(kg·m-2)	beat per minute/BPM	systolic blood pressure/sBP(mmHg)	diastolic blood pressure/dBP(mmHg)
B1	male	22	188	67	18.9565	65	100	70
B2	male	21	175	65	21.2245	70	112	70
B3	male	22	175	60	19.5918	61	100	70
B4	male	21	188	73	20.6541	62	120	68
B5	male	20	180	71	21.9136	62	120	74
B6	female	18	163	50	18.8189	65	96	58
B7	female	20	161	50	19.2894	64	110	70
B8	female	19	168	55	19.487	68	100	70
B9	female	20	168	50	17.7154	66	100	70
B10	female	19	170	50	17.301	63	96	50
